# Supplementary material for: Fabrication of Au aerogels with {110}-rich facets by size-dependent surface reconstruction for enzyme-free glucose detection
Source: Royal Society of Chemistry journal article supplement (doi:10.1039/c9tb01653h), 2019-01-01
Supplement: c9tb01653h1.pdf [file c9tb01653h1.pdf]

## Electronic Supplementary Information

### **Fabrication of Au Aerogels with {110}-Rich Facets by Size-dependent Surface Reconstruction for Enzyme-free Glucose Detection**

Cui Wang,<sup>a</sup> Wenchao Duan,<sup>a</sup> Lixiang Xing,<sup>a</sup> Yujiao Xiahou,<sup>a</sup> Wei Du,<sup>b</sup> and Haibing Xia<sup>\*, a</sup>

<sup>a</sup> State Key Laboratory of Crystal Materials, Shandong University, Jinan, 250100, P. R. China.

<sup>b</sup> School of Environment and Material Engineering, Yantai University, Yantai 264005, Shandong, China.

\*E-mail: hbxia@sdu.edu.cn

**Scheme S1** Schematic representation of formation process of Au<sup>6-16</sup> aerogels at the optimal particle ratio. R is the size ratio of large Au NPs (16 nm) to small Au NPs (6 nm). No surface reconstruction occurs at this R. {111} and {100} facets were labelled and black lines on the surface of 16 nm Au NPs represent {110} facets.

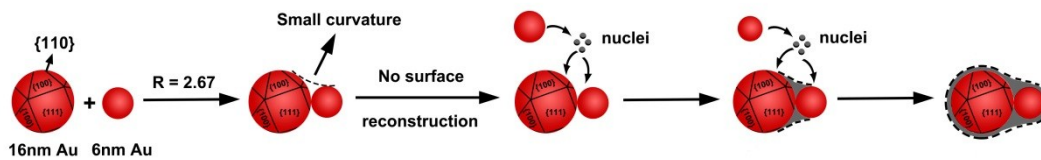

**Scheme S2** Schematic representation of formation process of Au<sup>6-30</sup> aerogels at the optimal particle ratio. R is the size ratio of large Au NPs (30 nm) to small Au NPs (6 nm). Surface reconstruction slightly occurs at the critical R. {111} and {100} facets were labelled and black lines on the surface of 30 nm Au NPs represent {110} facets.

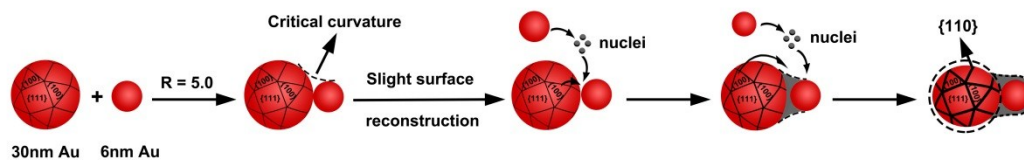

**Scheme S3** Schematic representation of formation process of Au<sup>6-50</sup> aerogels at the particle ratio of bigger than the optimal ratio. R is the size ratio of large Au NPs (50 nm) to small Au NPs (6 nm). Surface reconstruction obviously occurs at the R. However, the {110} facets would disappear and transfer into {100} facets due to the further overgrowth. {111} and {100} facets were labelled and black lines on the surface of 50 nm Au NPs represent {110} facets.

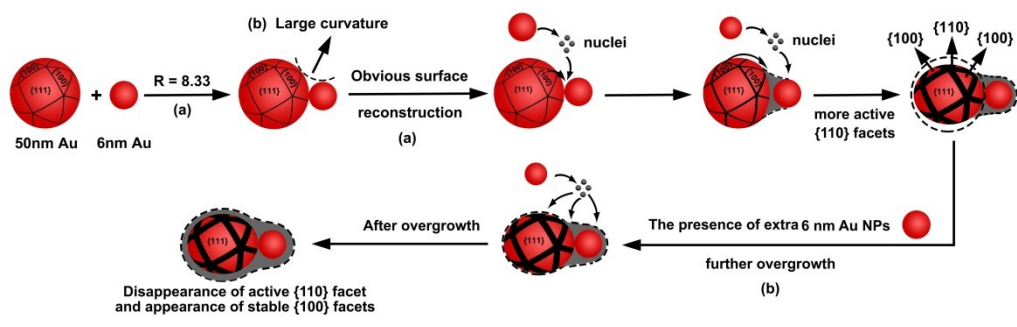

**Fig. S1** TEM images of 6 nm Au NPs (a), 16 nm Au NPs (b), 30 nm Au NPs (c), and 50 nm Au NPs (d).

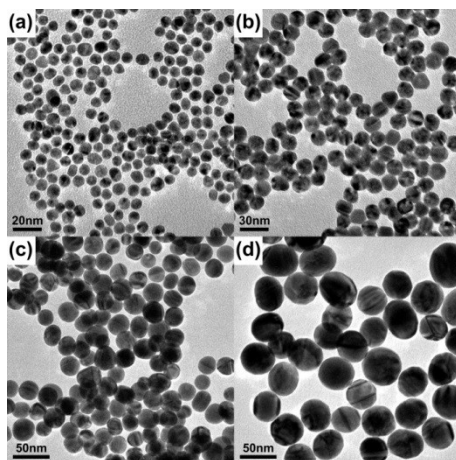

**Fig. S2** CV curves of Au<sup>6-16</sup> aerogels (A), Au<sup>6-30</sup> aerogels (B), and Au<sup>6-50</sup> aerogels (C) prepared at the different particle ratios, measured in 0.5 M H<sub>2</sub>SO<sub>4</sub> with a scan rate of 50 mV s<sup>-1</sup> in the region of -0.3 ~ 1.5 V. The particle ratios of 6 nm to 16 nm Au NPs used for synthesis of the corresponding Au<sup>6-16</sup> aerogels with different exposed surface facets (Fig. 1A) are (a) 2, (b) 9, and (c) 36, respectively. The particle ratios of 6 nm to 30 nm Au NPs used for synthesis of Au<sup>6-30</sup> aerogels with different exposed surface facets (Fig. 1B) are (a) 3, (b) 12, and (c) 48, respectively. The particle ratios of 6 nm to 50 nm Au NPs used for synthesis of Au<sup>6-50</sup> aerogels with different exposed surface facets (Fig. 1C) are (a) 8, (b) 24, and (c) 96, respectively. In each case, the particle number of 6 nm Au NPs was fixed.

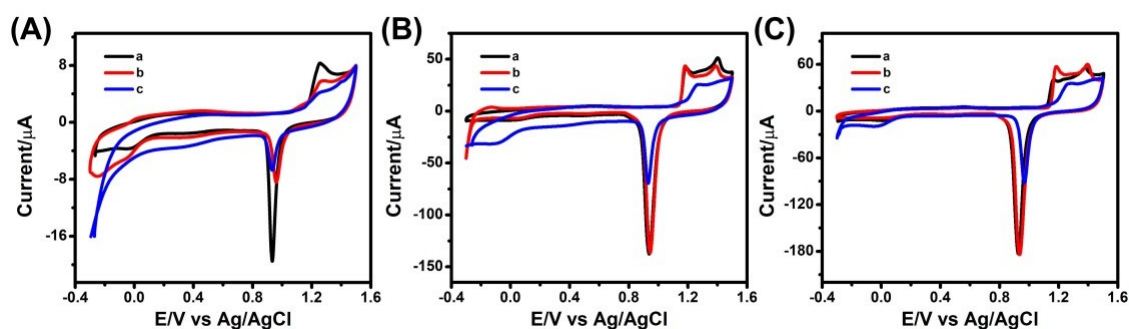

**Fig. S3** De-convoluted CV curves of Au<sup>6-23</sup> aerogels (a), and Au<sup>6-35</sup> aerogels (b), which were measured in H<sub>2</sub>SO<sub>4</sub> (0.5 M) with a scan rate of 50 mV s<sup>-1</sup>.

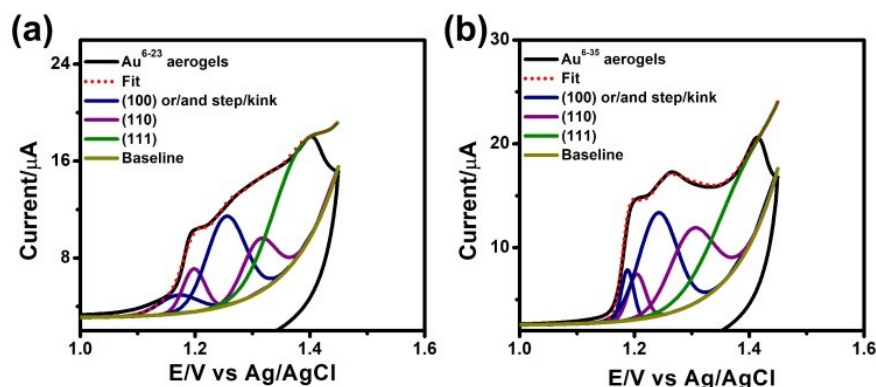

Additionally, the ratio of facets exposed on the surface of Au<sup>6-23</sup> aerogels and Au<sup>6-35</sup> aerogels were also calculated by de-convoluting their CV curves (Fig. S3, Table S1). The ratio of {110}, {100} and {111} facets in Au<sup>6-23</sup> aerogels are calculated to be 18.72%, 35.73%, and 45.55%, respectively. Moreover, the ratio of {110}, {100} and {111} facets in Au<sup>6-35</sup> aerogels are calculated to be 26.86%, 29.66%, and 43.48%, respectively. It is clear that the ratio of {110} in Au<sup>6-23</sup> aerogels is a little lower than those in 6 nm Au NPs and Au<sup>6-30</sup> aerogels (Table 1). In addition, the ratio of {110} facets in Au<sup>6-35</sup> aerogels is relatively higher than that of 6 nm Au NPs and Au<sup>6-30</sup> aerogels.

**Fig. S4** De-convoluted CV curves of 6 nm Au NPs (a), 16 nm Au NPs (b), 30 nm Au NPs (c), and 50 nm Au NPs (d), which were measured in H<sub>2</sub>SO<sub>4</sub> (0.5 M) with a scan rate of 50 mV s<sup>-1</sup>.

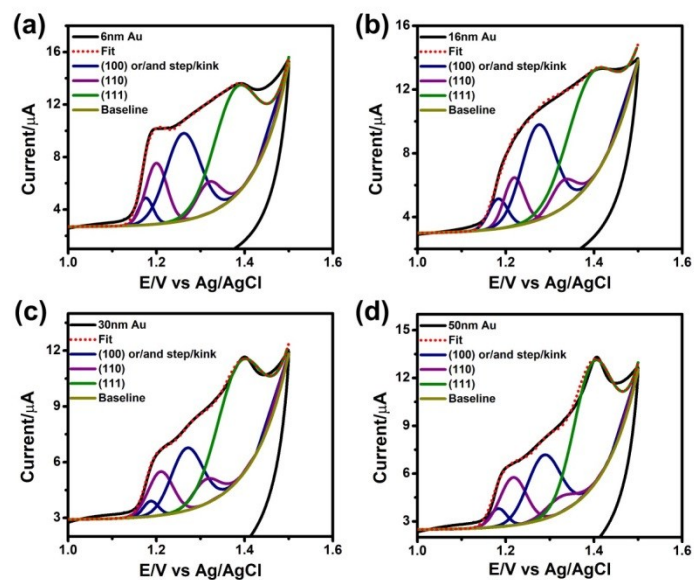



**Fig. S5** TEM images of the corresponding intermediates taken out at different times after the addition of NaCl solution into the mixed aqueous dispersions of Au NPs of 6 and 16 nm at the optimal particle ratio: (a) 0 min, (b) 1 min, (c) 5 min, (d) 12 min, (e) 30 min, (f) 1 h, (g) 3 h, and (h) 6 h. The insets in (a-h) are photographs of corresponding color of mixed aqueous dispersions of Au NPs in the presence of NaCl at different times.

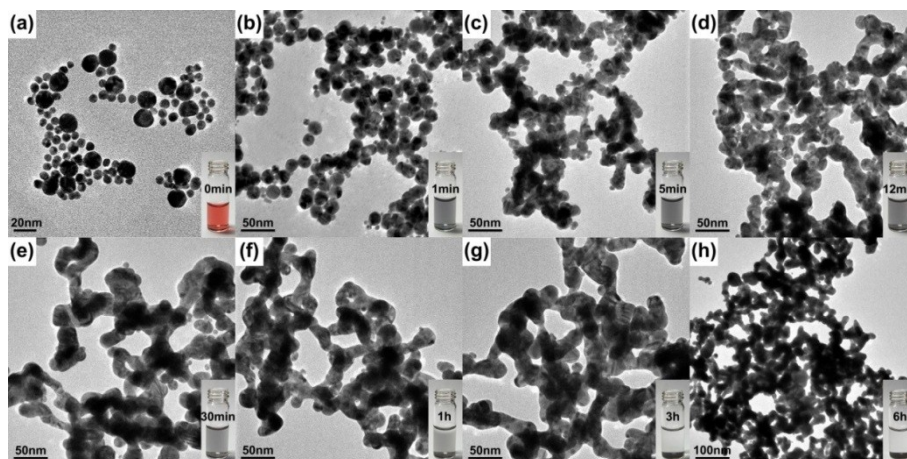

**Fig. S6** TEM images of the corresponding intermediates taken out at different times after the addition of NaCl solution into the mixed aqueous dispersions of Au NPs of 6 and 30 nm at the optimal particle ratio: (a) 0 min, (b) 1 min, (c) 3 min, (d) 5 min, (e) 10 min, (f) 30 min, (g) 1 h, and (h) 4 h. The insets in (a-h) are photographs of corresponding color of mixed aqueous dispersions of Au NPs in the presence of NaCl at different times.

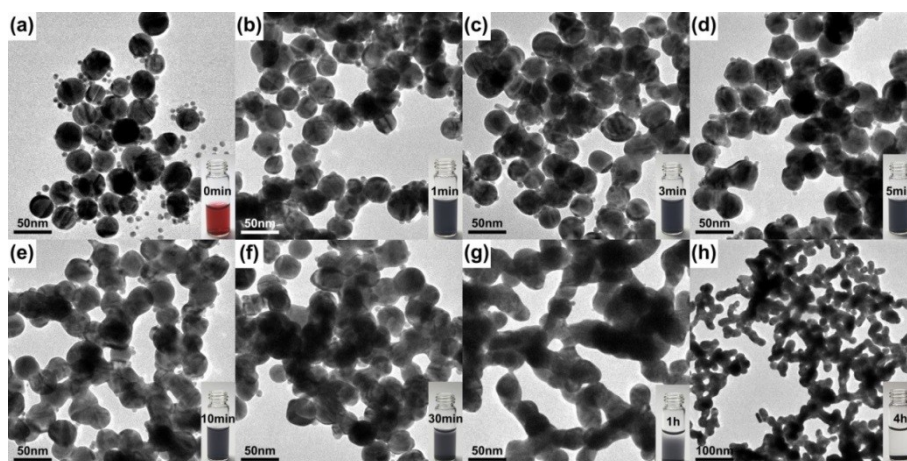

**Fig. S7** TEM images of the corresponding intermediates taken out at different times after the addition of NaCl solution into the mixed aqueous dispersions of Au NPs of 6 and 50 nm at the optimal particle ratio: (a) 0 min, (b) 1 min, (c) 3 min, (d) 5 min, (e) 10 min, (f) 30 min, (g) 1 h, and (h) 3 h. The insets in (a-h) are photographs of corresponding color of mixed aqueous dispersions of Au NPs in the presence of NaCl at different times.

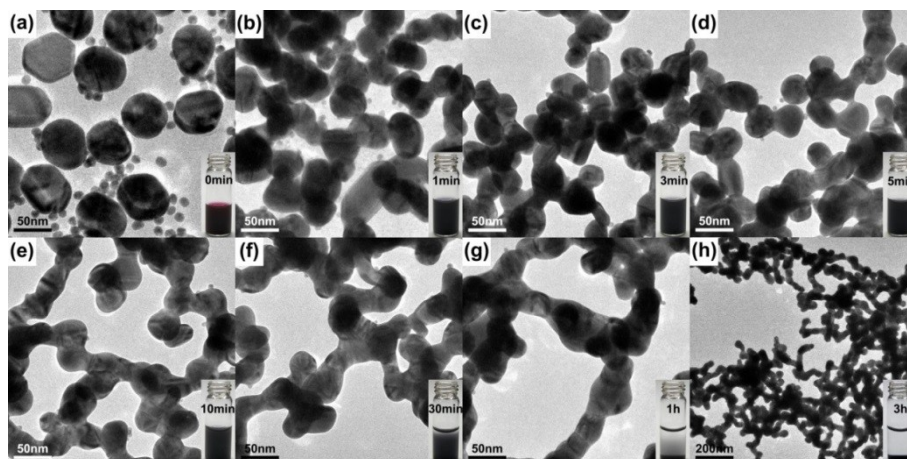

**Fig. S8** High magnification TEM images of Au<sup>6-16</sup> aerogels (a, b, and c), Au<sup>6-30</sup> aerogels (d, e, and f), and Au<sup>6-50</sup> aerogels (g, h, and i) containing the maximum ratio of {110}-facets on the surfaces, respectively. The atom steps were labelled by red ( {100} (0.204 nm) or {110} (0.144nm) facets) and black ( {111} facets (0.235 nm)) short lines, respectively.

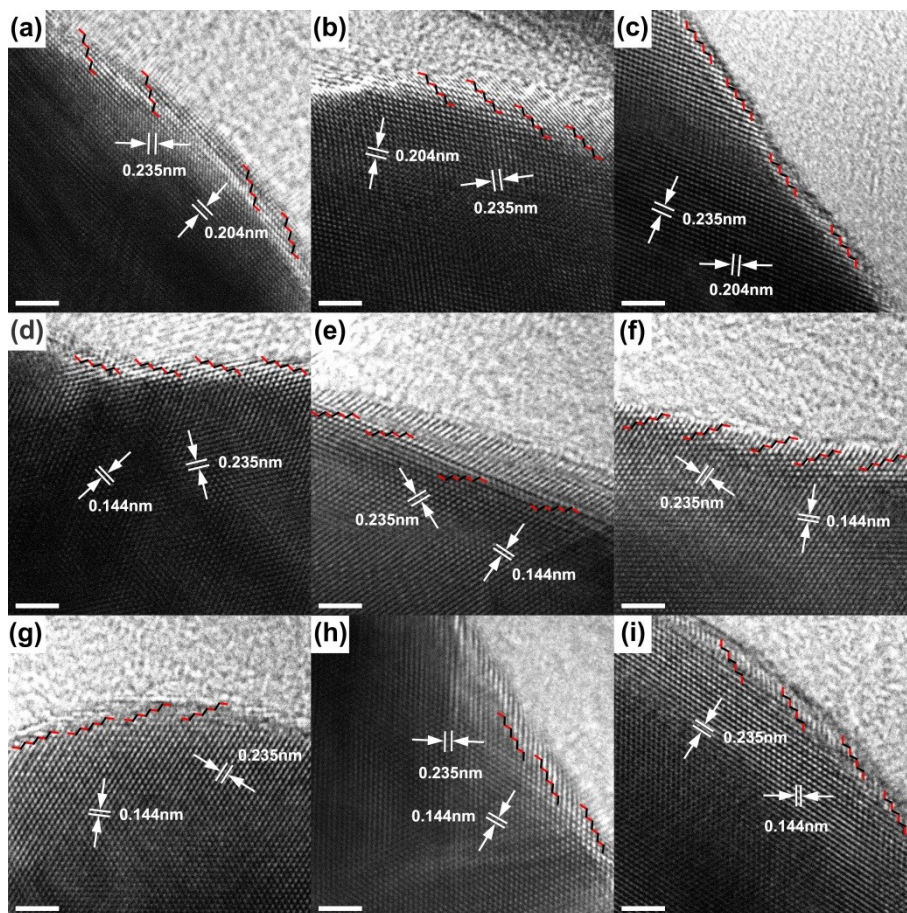

**Fig. S9** Comparison of the calculated ratios of the response current of glucose-to-AA and glucose-to-UA on Au<sup>6-50</sup> aerogels with the highest ratio of {110}-facets at seven different applied potentials. The concentration of glucose, AA, and UA are 0.5 mM, 0.05 mM and 0.05 mM, respectively.

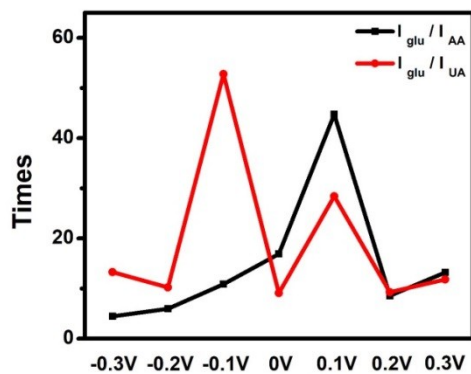

**Fig. S10** CV curves of the corresponding  $\text{Au}^{m-n}$  aerogels with the highest ratio of {110}-facets in NaOH (0.1 M):  $\text{Au}^{6-16}$  aerogels (black),  $\text{Au}^{6-30}$  aerogels (red) and  $\text{Au}^{6-50}$  aerogels (blue). Scan rate:  $50 \text{ mV s}^{-1}$ .

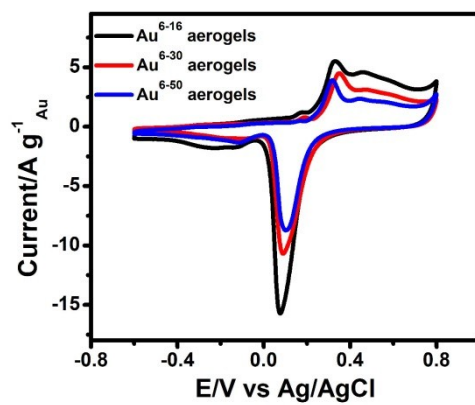

**Fig. S11** (a) Amperometric responses of different concentrations of glucose on Au<sup>6-16</sup> aerogels with the highest ratio of {110}-facets at the optimal applied potential of 0.1 V. The glucose was successively added into the NaOH solution (0.1 M) under a continuous stirring condition. (b) The corresponding calibration curve obtained by plotting the response currents of each concentration of glucose at the steady state. The insets in (a) and (b) are the local enlargements of the areas labeled by dashed red line.

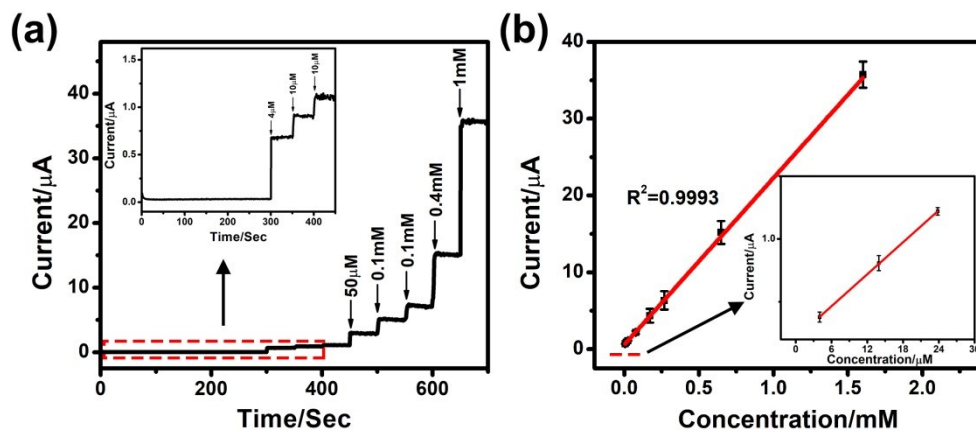

**Fig. S12** (a) Amperometric responses of different concentrations of glucose on Au<sup>6-30</sup> aerogels with the highest ratio of {110}-facets at the optimal applied potential of 0.1 V. The glucose was successively added into the NaOH solution (0.1 M) under a continuous stirring condition. (b) The corresponding calibration curve obtained by plotting the response currents of each concentration of glucose at the steady state. The insets in (a) and (b) are the local enlargements of the areas labeled by dashed red line.

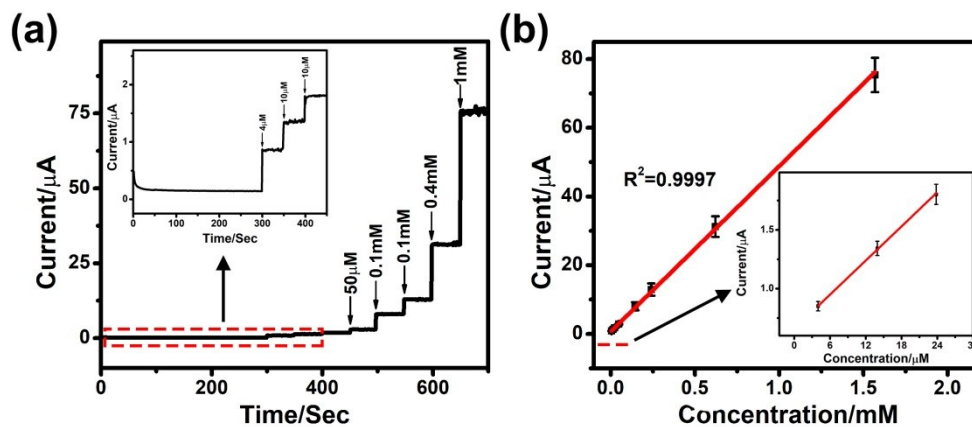



**Fig. S13** (a) Amperometric responses of glucose (0.2 mM) on GCEs modified by a batch of three Au<sup>6-50</sup> aerogels with the highest ratio of {110}-facets at the optimal applied potential of 0.1 V. The glucose was successively added into the NaOH (0.1 M) under a continuous stirring condition. (b) The corresponding calibration curve obtained by plotting the response currents of each concentration of glucose at the steady state.

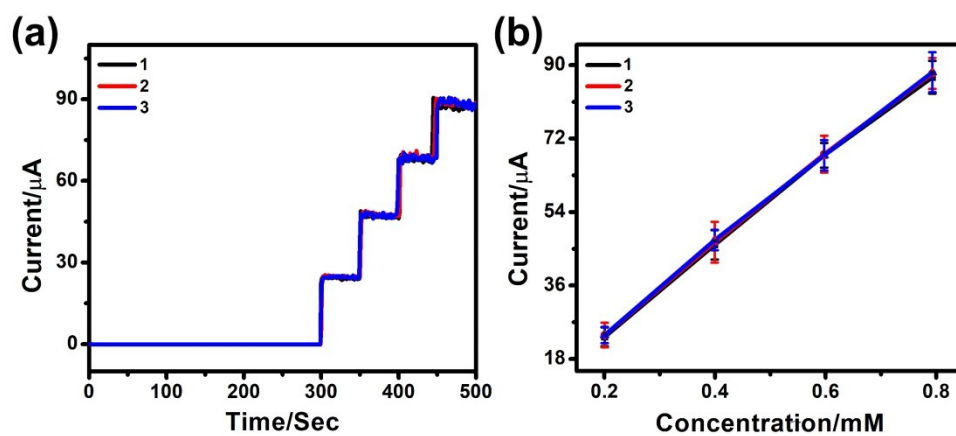

**Fig. S14** (a) CV curves and (b) corresponding line charts selected from the successive potential cycling of Au<sup>6-50</sup> aerogels with the highest ratio of {110}-facets in NaOH (0.1 M) containing glucose (5 mM). Scan rate: 50 mV s<sup>-1</sup>. (c) Histogram of the amperometric responses of glucose (5 mM) on Au<sup>6-50</sup> aerogels with the highest ratio of {110}-facets in NaOH (0.1 M) under a continuous stirring condition at the optimal applied potential of 0.1 V within 5 weeks storage period. The amperometric response in the first week is defined as 100%. Error bars represent the standard deviations among three measurements.

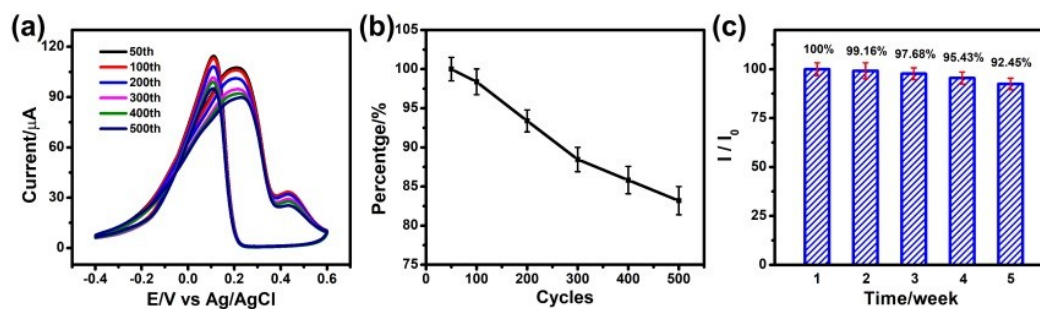

**Table S1** Detailed recipes for synthesis of selected three groups of Au<sup>m-n</sup> aerogels.

| Au <sup>m-n</sup><br>aerogels | Particle ratio of 6nm<br>Au to 16, 23, 30, 35,<br>or 50nm Au | Volume<br>of 6nm<br>Au<br>solution<br>(mL) | Particle<br>ratio of<br>6nm Au<br>(NPs/mL) | Volume of<br>16, 23, 30,<br>35 or 50nm<br>Au solution<br>(mL) | Particle ratio<br>of 16, 23, 30,<br>35, or 50nm<br>Au solution<br>(NPs/mL) |
|-------------------------------|--------------------------------------------------------------|--------------------------------------------|--------------------------------------------|---------------------------------------------------------------|----------------------------------------------------------------------------|
| Au <sup>6-16</sup>            | 6nm:16nm=1:1/2                                               | 0.74                                       | 1.76*10 <sup>13</sup>                      | 1.26                                                          | 5.18*10 <sup>12</sup>                                                      |
| Au <sup>6-16</sup>            | 6nm:16nm=1:1/9                                               | 0.74                                       | 1.76*10 <sup>13</sup>                      | 1.26                                                          | 1.15*10 <sup>12</sup>                                                      |
| Au <sup>6-16</sup>            | 6nm:16nm=1:1/36                                              | 0.74                                       | 1.76*10 <sup>13</sup>                      | 1.26                                                          | 2.87*10 <sup>11</sup>                                                      |
| Au <sup>6-23</sup>            | 6nm:23nm=1:1/10                                              | 0.74                                       | 1.76*10 <sup>13</sup>                      | 1.26                                                          | 1.76*10 <sup>12</sup>                                                      |
| Au <sup>6-30</sup>            | 6nm:30nm=1:1/3                                               | 0.74                                       | 1.76*10 <sup>13</sup>                      | 1.26                                                          | 3.45*10 <sup>12</sup>                                                      |
| Au <sup>6-30</sup>            | 6nm:30nm=1:1/12                                              | 0.74                                       | 1.76*10 <sup>13</sup>                      | 1.26                                                          | 8.61*10 <sup>11</sup>                                                      |
| Au <sup>6-30</sup>            | 6nm:30nm=1:1/48                                              | 0.74                                       | 1.76*10 <sup>13</sup>                      | 1.26                                                          | 2.15*10 <sup>11</sup>                                                      |
| Au <sup>6-35</sup>            | 6nm:16nm=1:1/12                                              | 0.74                                       | 1.76*10 <sup>13</sup>                      | 1.26                                                          | 8.61*10 <sup>11</sup>                                                      |
| Au <sup>6-50</sup>            | 6nm:50nm=1:1/8                                               | 0.74                                       | 1.76*10 <sup>13</sup>                      | 1.26                                                          | 1.29*10 <sup>12</sup>                                                      |
| Au <sup>6-50</sup>            | 6nm:50nm=1:1/24                                              | 0.74                                       | 1.76*10 <sup>13</sup>                      | 1.26                                                          | 4.31*10 <sup>11</sup>                                                      |
| Au <sup>6-50</sup>            | 6nm:50nm=1:1/96                                              | 0.74                                       | 1.76*10 <sup>13</sup>                      | 1.26                                                          | 1.08*10 <sup>11</sup>                                                      |

Note that the particle number of 6 nm Au NPs was fixed and that of other Au NPs (16, 23, 30, 35, and 50 nm) was accordingly adjusted. In addition, the volume of other Au NPs (16, 23, 30, 35 and 50 nm) was diluted or concentrated to 1.26 mL for further use but keeping their corresponding particle number. In addition, the particle ratios used for synthesis of Au<sup>6-23</sup> and Au<sup>6-35</sup> aerogels are the optimal.

**Table S2** Comparison of average sizes of thin and thick ligaments, and islands in the Au<sup>6-16</sup> aerogels, Au<sup>6-30</sup> aerogels, and Au<sup>6-50</sup> aerogels, which all obtained at the optimal particle ratios.

| Sample                      | averages size of thin ligaments (nm) | averages size of thick ligaments (nm) | averages size of islands(nm) |
|-----------------------------|--------------------------------------|---------------------------------------|------------------------------|
| Au <sup>6-16</sup> aerogels | 11.2±1.5                             | 25.3±3.6                              | 62.3±6.5                     |
| Au <sup>6-30</sup> aerogels | 20.6±3.1                             | 38.2±4.5                              | 89.9±8.0                     |
| Au <sup>6-50</sup> aerogels | 33.2±4.5                             | 52.0±5.4                              | 102±9.5                      |

**Table S3** Comparison of the response time of our sample in glucose detection with that reported in literatures.

| Electrode materials         | Medium     | Response time | Ref       |
|-----------------------------|------------|---------------|-----------|
| Au <sup>6-50</sup> aerogels | 0.1 M NaOH | 2s            | This work |
| HNPG/AuSn                   | 0.1 M NaOH | 4s            | 1         |
| Porous gold cluster         | 0.2 M NaOH | 5s            | 2         |
| Co-MOF nanosheet            | 0.1 M NaOH | 3s            | 3         |
| Au NPs modified<br>CuO NWs  | 0.1 M NaOH | 5s            | 4         |

HNPG represents highly nanoporous gold film, NWs represents nanowires.

## References

- 1 Y. Pei, M. Hu, F. Tu, X. Tang, W. Huang, S. Chen, Z. Li and Y. Xia, *Biosens. Bioelectron.*, 2018, **117**, 758–765.
- 2 L. Han, S. Zhang, L. Han, D.-P. Yang, C. Hou and A. Liu, *Electrochimica Acta*, 2014, **138**, 109–114.
- 3 Y. Li, M. Xie, X. Zhang, Q. Liu, D. Lin, C. Xu, F. Xie and X. Sun, *Sens. Actuators B*, 2019, **278**, 126-132.
- 4 A. K. Mishra, B. Mukherjee, A. Kumar, D. K. Jarwal, S. Ratan, C. Kumar and S. Jit, *RSC Adv.*, 2019, **9**, 1772-1781.
